# Supplementary material for: Modulating the Schottky barrier of Pt/PbTiO3 for efficient piezo-photocatalytic hydrogen evolution
Source: Royal Society of Chemistry journal article supplement (doi:10.1039/d3dt00707c), 2023-01-01
Supplement: d3dt00707c1.pdf [file d3dt00707c1.pdf]

## Supplementary Material

### **Modulating the Schottky barrier of Pt/PbTiO<sub>3</sub> for efficient piezo-photocatalytic hydrogen evolution**

Xueyan Huang<sup>a,\*</sup>, Zhi-Bin Fang<sup>c,\*</sup>, Wenhui Feng<sup>d</sup>, Qinfen Tian<sup>e</sup>, Zhiqiang Li<sup>a</sup>, Ping Liu<sup>b,\*</sup>

*<sup>a</sup>School of Automobile, Fujian Chuanzheng Communications College, Fuzhou 350007, P.R. China.*

*<sup>b</sup>Research Institute of Photocatalysis, State Key Laboratory of Photocatalysis on Energy and Environment, Fuzhou University, Fuzhou 350002, P.R. China.*

*<sup>c</sup>State Key Laboratory of Structural Chemistry, Fujian Institute of Research on the Structure of Matter, Chinese Academy of Sciences, Fuzhou 350002, PR China.*

*<sup>d</sup>Hunan Province Key Laboratory of Applied Environmental Photocatalysis, Changsha University, Changsha 410022, P. R. China.*

*<sup>e</sup>College of Media and Exhibition, Fujian Business University, Fuzhou 350500, P. R. China*

*\*Corresponding author.*

*E-mail addresses: huang920829@163.com (X. Huang),*

*liuping@fzu.edu.cn (P. Liu), fangzhibin@fjirsm.ac.cn (Z. B. Fang).*

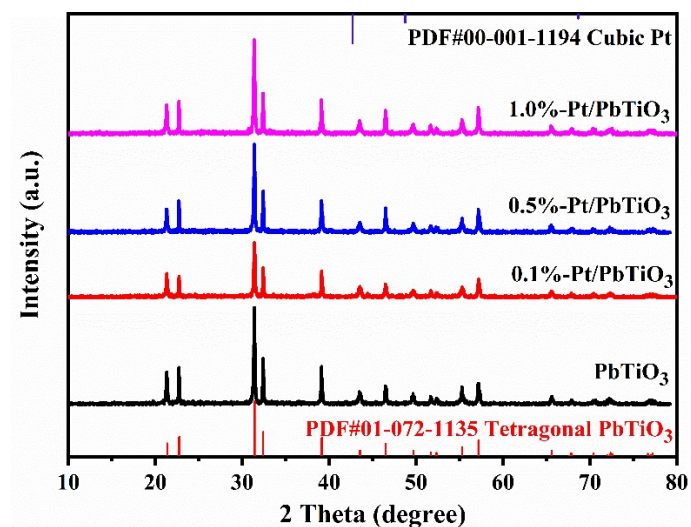

**Fig. S1** Typical XRD patterns of bare  $\text{PbTiO}_3$ , 0.1%  $\text{Pt/PbTiO}_3$ , 0.5%  $\text{Pt/PbTiO}_3$  and 1.0%  $\text{Pt/PbTiO}_3$ .

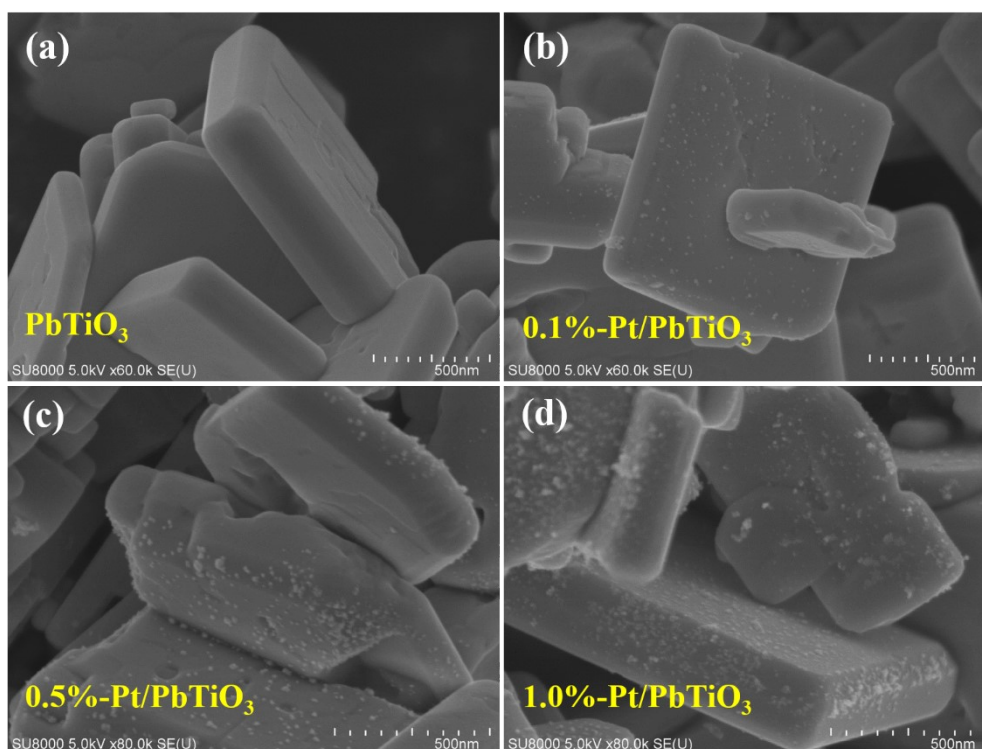

**Fig. S2** SEM images of bare  $\text{PbTiO}_3$ , 0.1%  $\text{Pt/PbTiO}_3$ , 0.5%  $\text{Pt/PbTiO}_3$  and 1.0%  $\text{Pt/PbTiO}_3$ .

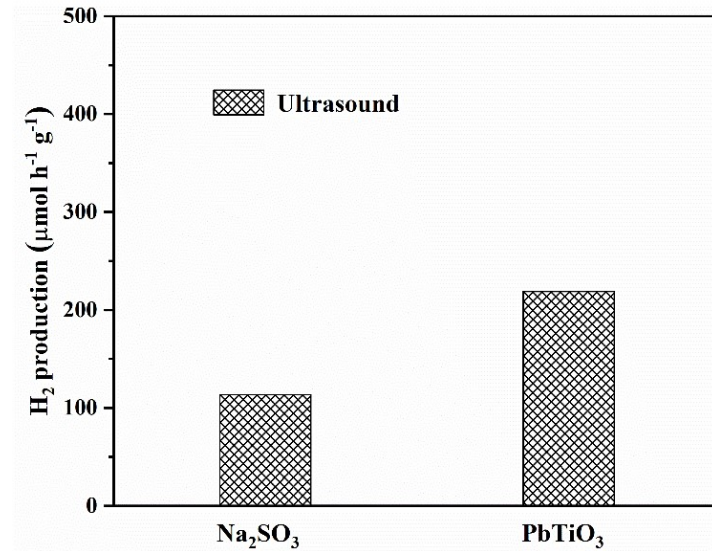

**Fig. S3** Comparison diagram of piezocatalytic hydrogen evolution rates.

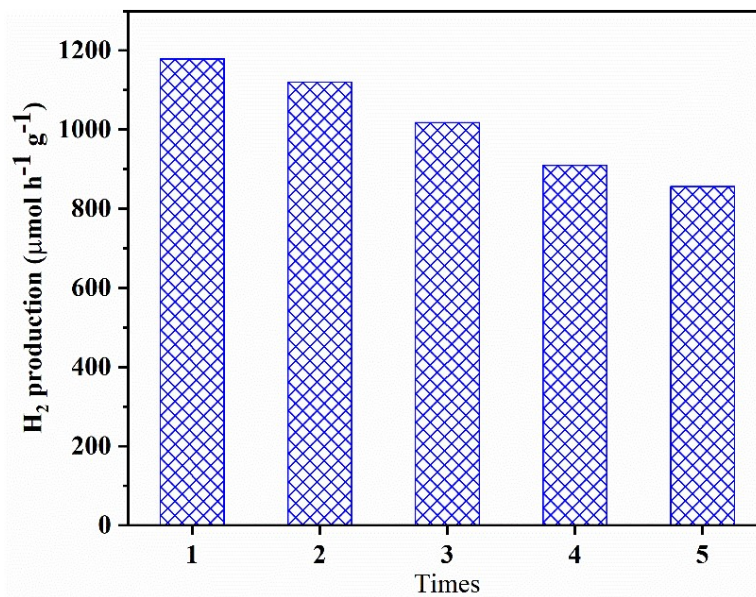

**Fig. S4** Time-circle piezo-photocatalytic H<sub>2</sub> evolution rate on 0.5%-Pt/PbTiO<sub>3</sub>.

The following formula can be used to calculate the band gap energy for one semiconductor[1].

$$\alpha h\nu = A(h\nu - E_g)^{n/2}$$

Where  $h\nu$ ,  $\alpha$ ,  $A$ , and  $E_g$  are light energy, absorption index, constant value, and band-gap energy of semiconductor, respectively. What is more,  $n$  relies on the transition type of semiconductor. The  $n$  for direct transition is equal to 1, while  $n$  is 4 for indirect transition.

Table S1 Related parameters for the calculation of  $V_p$  of  $\text{PbTiO}_3$

| $w_3$                              | $T_3$ [2]              | $d_{33}$ [3] | $\epsilon_0$ [4]           | $\epsilon_r$ [5] |
|------------------------------------|------------------------|--------------|----------------------------|------------------|
| 172 nm<br>(according to PFM image) | $1.01 \times 10^5$ kPa | 70 pm/V      | $8.85 \times 10^{-12}$ F/m | 550              |

Because of the different between the work function of Pt and the electron affinity of  $\text{PbTiO}_3$ , a Schottky junction forms between the  $\text{PbTiO}_3$  nanoplate and Pt-coated tip. The bottom of  $\text{PbTiO}_3$  nanoplate was connected to ITO conductive film. Since the piezoelectric polarization charges only existed at the top surface of nanoplate and the bottom surface of nanoplate contact with ITO and the contact between ITO and bottom nanoplate surface was rather large, the influence of the piezopotential on the bottom  $\text{PbTiO}_3$ -ITO contact can be neglected. Therefore, it is reasonable to assume that the Schottky barrier formed at the Pt- $\text{PbTiO}_3$  interface and dominates the IV characteristics.

Table S2 Comparison results of H<sub>2</sub> production rate via piezo-photocatalysis

| Catalysts                                                       | Catalytic Conditions                                     | Sacrificial Agents                                      | Catalytic Activity                          | Ref.      |
|-----------------------------------------------------------------|----------------------------------------------------------|---------------------------------------------------------|---------------------------------------------|-----------|
| Bi <sub>0.5</sub> Na <sub>0.5</sub> TiO <sub>3</sub> nanosphere | Ultrasonic (40 kHz, 110 W); Xe lamp (300 W)              | Triethanolamine                                         | 158 μmol h <sup>-1</sup> g <sup>-1</sup>    | [6]       |
| PbTiO <sub>3</sub> -CdS-10%                                     | Ultrasonic (40 kHz, 100 W); Xe lamp (300 W) (λ ≥ 420 nm) | 0.1 M Na <sub>2</sub> S/Na <sub>2</sub> SO <sub>3</sub> | 849 μmol h <sup>-1</sup> g <sup>-1</sup>    | [7]       |
| KNbO <sub>3</sub> /MoS <sub>2</sub> heterostructure             | Ultrasonic (40 kHz, 110 W); Xe lamp (300 W)              | Triethanolamine                                         | 96 μmol h <sup>-1</sup> g <sup>-1</sup>     | [8]       |
| R3C ZnSnO <sub>3</sub> Nanowires                                | Ultrasonic (40 kHz, 250 W); Xe lamp (150 W)              | Ethyl alcohol                                           | 857 μmol h <sup>-1</sup> g <sup>-1</sup>    | [9]       |
| ZnO nanowires                                                   | Ultrasonic (40 kHz, 50 W); Xe lamp (50 W)                | Methanol                                                | 1.9 μmol h <sup>-1</sup> g <sup>-1</sup>    | [10]      |
| TiO <sub>2</sub> /ZnO nanowires                                 | Ultrasonic (40 kHz, 50 W); Xe lamp (50 W)                | Methanol                                                | 3.1 μmol h <sup>-1</sup> g <sup>-1</sup>    | [10]      |
| 0.5%-Pt/PbTiO <sub>3</sub>                                      | Ultrasonic (40 kHz, 100 W); λ ≥ 400 nm, Xe lamp (300 W)  | 0.1 M Na <sub>2</sub> SO <sub>3</sub>                   | 1181.3 μmol h <sup>-1</sup> g <sup>-1</sup> | This work |

## Reference

- [1] F. Chen, Z. Ren, S. Gong, X. Li, G. Shen and G. Han, *Chemistry*, 2016, **22**, 12160-12165.
- [2] H. You, Z. Wu, L. Zhang, Y. Ying, Y. Liu, L. Fei, X. Chen, Y. Jia, Y. Wang, F. Wang, S. Ju, J. Qiao, C. H. Lam and H. Huang, *Angewandte Chemie*, 2019,
- [3] A. L. Kholkin, M. L. Calzada, P. Ramos, J. Mendiola and N. Setter, *Applied Physics Letters*, 1996, 69, 3602-3604.
- [4] K. Sun, J. Xin, Y. Li, Z. Wang, Q. Hou, X. Li, X. Wu, R. Fan and K. Leong Choy, *Journal of Materials Science & Technology*, 2019, **35**, 2463-2469.
- [5] Sahu, Niranjana, M. Kar, and S. Panigrahi, Rietveld refinement. *Arch Phys Res* 1 (2010): 75-87.
- [6] Z. Zhao, L. Wei, S. Li, L. Zhu, Y. Su, Y. Liu, Y. Bu, Y. Lin, w. Liu and Z. Zhang. *Journal of Materials Chemistry A*, 2020.
- [7] X. Huang, R. Lei, J. Yuan, F. Gao, C. Jiang, W. Feng, J. Zhang, P. Liu. *Applied*

Catalysis B: Environmental, 2021, 282: 119586.

[8] S. Jia, Y. Su, B. Zhang, Z. Zhao, S. Li, Y. Zhang, P. Li, M. Xu and R. Ren. *Nanoscale*, 2019, 11(16): 7690-7700.

[9] Y. Wang, J. Wu. *Advanced Functional Materials*, 2019, 30(5): 1907619.

[10] Z. Wang, T. Hu, H. He, Y. Fu, X. Zhang, J. Sun, L. Xing, B. Liu, Y. Zhang, X. xue. *ACS Sustainable Chemistry & Engineering*, 2018, 6(8): 10162-10172.
